# Supplementary material for: Identification of Atrial Fibrillation-Associated Genes ERBB2 and MYPN Using Genome-Wide Association and Transcriptome Expression Profile Data on Left–Right Atrial Appendages
Source: Front Genet. 2021 Jun 30;12:696591. doi: 10.3389/fgene.2021.696591 (PMC8278573; doi:10.3389/fgene.2021.696591)
Supplement: Supplementary file 4 [file Table_4.XLSX]

## Sheet: Legend
One table is included.
Sheet Yellowbrowmagenta.edges
Table 1 The edge file from yellow, brown, and magenta modules for Cytosacpe

## Sheet: Yellowbrowmagenta.edges
fromNode	toNode	weight	direction	fromAltName	toAltName	net_colors
ATP2A2	NDUFC1	0.1619	undirected	NA	NA	brown
BAZ2A	HAND2	0.244039	undirected	NA	NA	brown
CDK14	CHST7	0.177625	undirected	NA	NA	magenta
CHCHD10	MYO5A	0.155277	undirected	NA	NA	brown
CLEC14A	FAM43A	0.157214	undirected	NA	NA	brown
CTNNA1	PDK1	0.168353	undirected	NA	NA	yellow
FGF11	MRPL12	0.156636	undirected	NA	NA	brown
GPR22	ROGDI	0.160047	undirected	NA	NA	brown
GPR22	SLC4A4	0.158358	undirected	NA	NA	brown
GPR22	JPH1	0.164735	undirected	NA	NA	brown
GPR22	LRRC49	0.159923	undirected	NA	NA	brown
H19	IGFBP3	0.199868	undirected	NA	NA	magenta
H19	SPP1	0.234402	undirected	NA	NA	magenta
H19	PPL	0.233377	undirected	NA	NA	magenta
H19	PRKCD	0.20233	undirected	NA	NA	magenta
H19	VWF	0.251062	undirected	NA	NA	magenta
H19	KDR	0.177915	undirected	NA	NA	magenta
H19	TNFAIP8L1	0.262015	undirected	NA	NA	magenta
H19	PREX2	0.220191	undirected	NA	NA	magenta
H19	VIPR2	0.174738	undirected	NA	NA	magenta
HLA-B	NLRC5	0.152349	undirected	NA	NA	yellow
INHA	PLEKHF1	0.202089	undirected	NA	NA	brown
INPP5J	TSPAN7	0.157697	undirected	NA	NA	brown
INPP5J	WNK1	0.150497	undirected	NA	NA	brown
INPP5J	RBFOX1	0.163725	undirected	NA	NA	brown
INPP5J	JPH1	0.157062	undirected	NA	NA	brown
KLF3	MAGI1	0.173287	undirected	NA	NA	yellow
LOXL1	SRPX2	0.153407	undirected	NA	NA	brown
MARVELD1	SUCLG1	0.1848	undirected	NA	NA	brown
MARVELD1	UQCRC2	0.16514	undirected	NA	NA	brown
MARVELD1	NDUFB5	0.152391	undirected	NA	NA	brown
MARVELD1	UQCRC1	0.182597	undirected	NA	NA	brown
MARVELD1	NDUFV2	0.182038	undirected	NA	NA	brown
ME2	SRPX2	0.18434	undirected	NA	NA	brown
ME2	TSPAN7	0.15547	undirected	NA	NA	brown
ME2	SLC4A4	0.16754	undirected	NA	NA	brown
ME2	PKD2	0.160713	undirected	NA	NA	brown
MLLT1	PLEKHF1	0.164489	undirected	NA	NA	magenta
MYH6	WDTC1	0.155811	undirected	NA	NA	brown
MYH6	NDUFB8	0.156088	undirected	NA	NA	brown
MYPN	TNPO3	0.164502	undirected	NA	NA	yellow
NDUFA13	OPA3	0.156915	undirected	NA	NA	brown
PSMB7	TXN2	0.157069	undirected	NA	NA	brown
RPL3L	UBE2Z	0.212067	undirected	NA	NA	yellow
RREB1	TMEM19	0.188731	undirected	NA	NA	brown
S100A1	TADA2B	0.169945	undirected	NA	NA	brown
SEC31A	ULK4	0.15134	undirected	NA	NA	brown
SEC31A	WNK1	0.167277	undirected	NA	NA	brown
SLC4A4	SRPX2	0.166201	undirected	NA	NA	brown
SLC4A4	WNK1	0.154434	undirected	NA	NA	brown
